# Supplementary material for: Längsschnittliche Zusammenhänge von Wortschatz, Grammatik und Leseverständnis mit mathematischen Fähigkeiten bei Grundschulkindern mit nicht-deutscher Familiensprache
Source: Atypon-hosted journal article supplement (doi:10.1024/1010-0652/a000342), 2022-02-03
Supplement: 1010-0652_a000342_esm1.pdf [file 1010-0652_a000342_esm1.pdf]

## Elektronisches Supplement 1

**Tabelle Supplement 1.** Effekte der Kontrollvariablen des Cross-Lagged-Panel-Modells (siehe Abb. 1); standardisierte Modellparameter und *p*-Werte

| <i>Variablen</i> | KG      |          | TB      |          | TF      |          |
|------------------|---------|----------|---------|----------|---------|----------|
|                  | $\beta$ | <i>p</i> | $\beta$ | <i>p</i> | $\beta$ | <i>p</i> |
| AR1              | .27     | <.01     | -       | -        | -       | -        |
| TA1              | .28     | <.01     | -       | -        | -       | -        |
| FA1              | .14     | <.01     | -       | -        | -       | -        |
| LV1              | .23     | <.01     | -       | -        | -       | -        |
| WS1              | .28     | <.01     | -       | -        | -       | -        |
| GR1              | .22     | <.01     | -       | -        | -       | -        |
| AR2              | .11     | .01      | .11     | .02      | .00     | .98      |
| TA2              | .06     | .11      | .06     | .26      | -.01    | .88      |
| FA2              | .20     | <.01     | .03     | .65      | .05     | .31      |
| LV2              | .11     | .01      | -.02    | .70      | -.01    | .86      |
| WS2              | .09     | .02      | .09     | .04      | .07     | .13      |
| GR2              | .07     | .11      | .02     | .67      | .02     | .67      |
| AR3              | .04     | .40      | -       | -        | -       | -        |
| TA3              | .07     | .07      | -       | -        | -       | -        |
| FA3              | .04     | .36      | -       | -        | -       | -        |
| LV3              | .01     | .75      | -       | -        | -       | -        |
| WS3              | -.01    | .71      | -       | -        | -       | -        |
| GR3              | .01     | .77      | -       | -        | -       | -        |

*Anmerkungen.*  $\chi^2 = 101.14$ ;  $df = 60$ ;  $\chi^2/df = 1.69$ ; RMSEA = .04; CFI = .99; AR = Arithmetik; TA = Textaufgaben; FA = Fachwortschatz; LV = Leseverständnis; WS = Wortschatz; GRA = Grammatik; KG = Allgemeine kognitive Grundfähigkeiten; TB = Bedeutungsfokussierte Förderung; TF = Formfokussierte Förderung; 1 = t1; 2 = t2; 3 = t3.

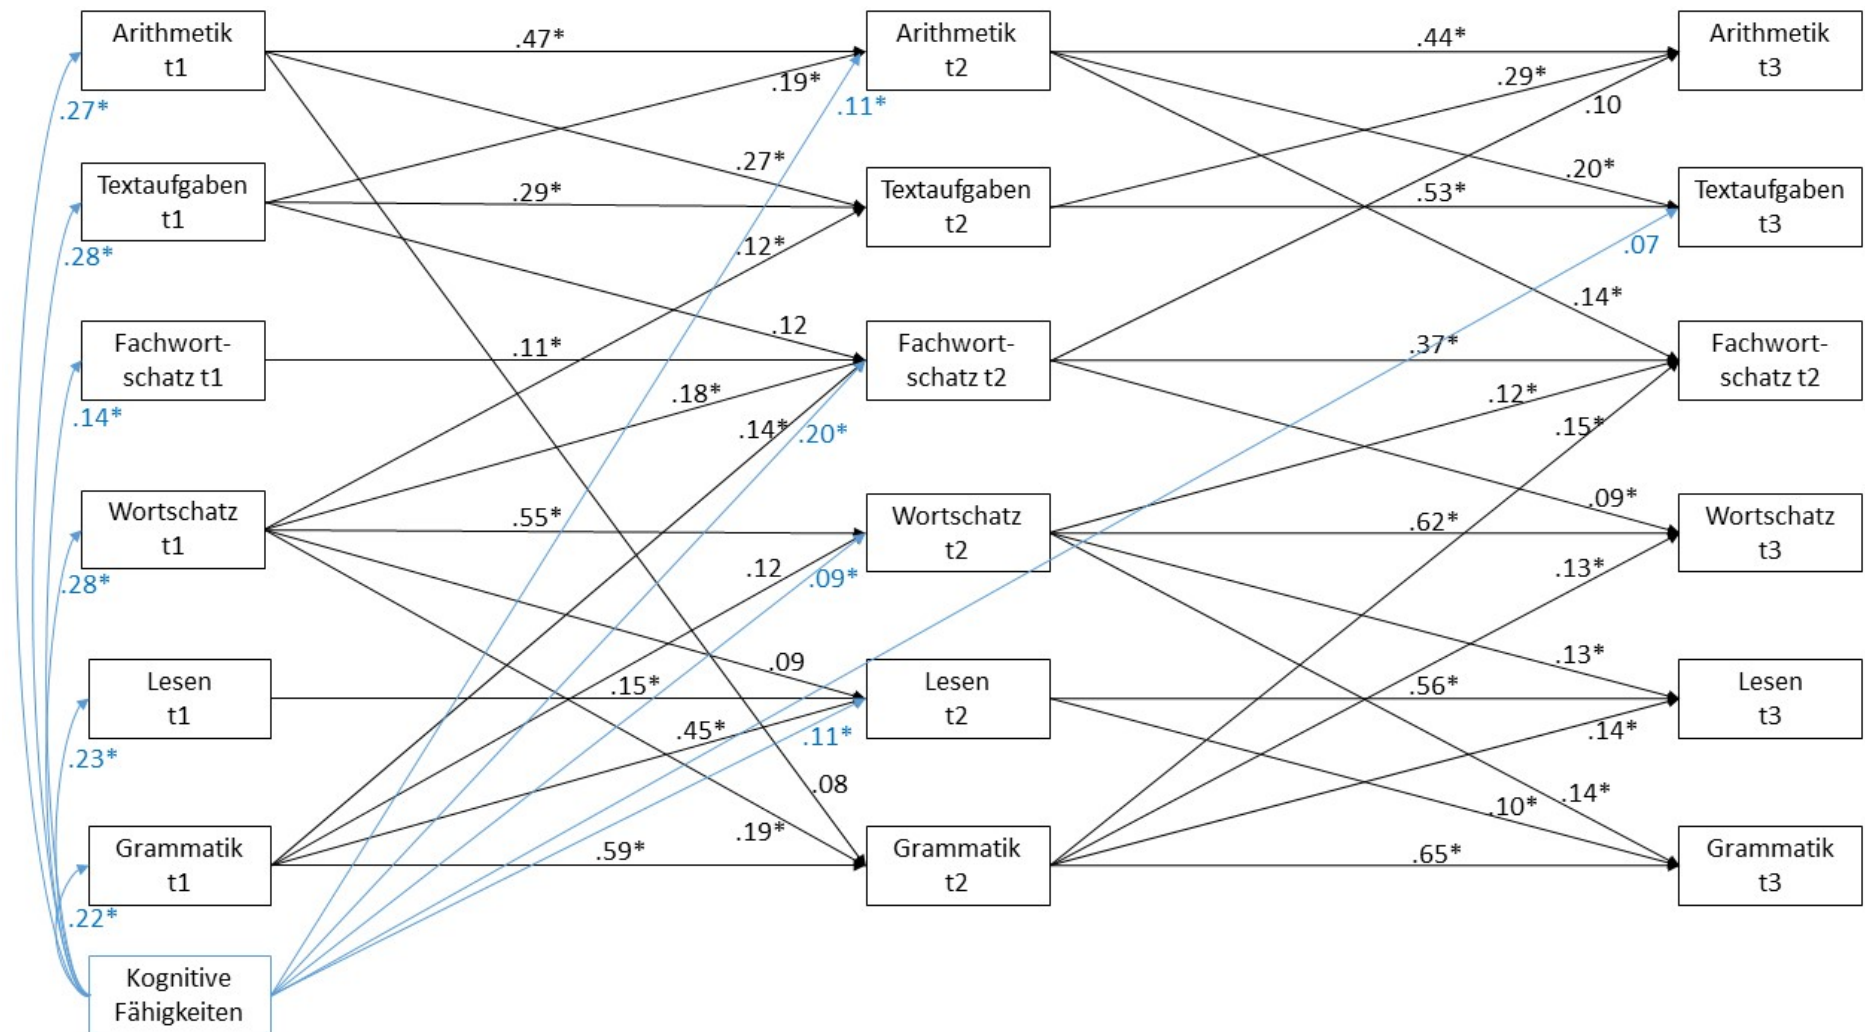

**Abbildung Supplement 1.** Cross-Lagged-Panel-Modell; dargestellt sind nur Pfade mit Koeffizienten  $p < .10$ ; \* $p < .05$ . Kovarianzen zwischen allen Variablen zu t1, t2, t3 sind zur besseren Lesbarkeit nicht dargestellt.
